# Supplementary material
Source: ML conference proceedings conference paper supplement (https://openaccess.thecvf.com/content/CVPR2022/html/Li_Time3D_End-to-End_Joint_CVPR_2022_paper.html)
Supplement: Supplementary file 1 [file Li_Time3D_End-to-End_Joint_CVPR_2022_supplemental.pdf]

# Supplementary Materials of Time3D: End-to-End Joint Monocular 3D Object Detection and Tracking for Autonomous Driving

Peixuan Li  
SAIC PP-CEM

lipeixuan@saicmotor.com

Jieyu Jin  
SAIC PP-CEM

jinjieyu@saicmotor.com

## 1. Monocular 3D Object Detection.

We design our monocular 3D object detector following the "joint detection and tracking" paradigm, FairMOT [2]. As shown in Fig. 2, We adopt FairMOT encoder-decoder as the main structure to our 3D detector, which applies a DLA-34 as the backbone to fuse multi-layer features. We employ a KM3D head to detect a 3D box, an anchor-free 3D detector, to provide fair features for detection and Re-ID. Specifically, five parallel heads are appended to FairMOT encoder-decoder to estimate object 2D main center, keypoints, dimension, orientation, and 3D score. The geometry reasoning module with camera intrinsic is applied to compute a 3D position. In the Re-ID branch, we apply a convolution layer with 256 kernels on top of backbone features to extract re-ID features for each location in the main center. KM3D branch is explicitly supervised by ground truth, and the Re-ID branch is implicitly supervised by spatial-temporal information flow.

In the ablation learning of non-end-to-end learning, we need to separate the 3D detector and Re-ID extractor. We simply employ two FairMOT encoder-decoder networks for 3D detection and Re-ID embedding extracting, respectively. We train the 3D detector following the KM3D pipeline [1]. We train the Re-ID branch only through tracking head in spatial-temporal information flow with other cues.

## 2. More Qualitative Results .

More qualitative results are shown in Fig. 3, Fig. 5, Fig. 4, including day and night, and different weather conditions.

## 3. More Ablation Studies .

We design the Temporal-Consistency Loss to constrain the trajectory smoothness in the training phase. This allows us to smooth the trajectory without any additional calculations and post-processing. It can be seen in the qualitative analysis that the trajectories generated by Time3D are smoother. Fig. 1 shows 3D corner error and Temporal-Consistency error with and without Temporal-Consistency

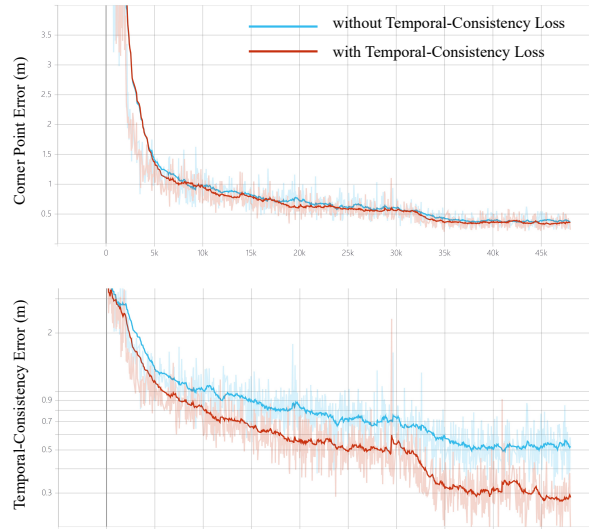

Figure 1. **Ablation Studies For Temporal-Consistency Loss.** Training on Nusences Training set. Corner Point Error denotes 3D corners distance between prediction and Ground Truth in a single frame. Temporal-Consistency Error denotes 3D corners distance between prediction and Ground Truth about the 3D corner distance of the same object in different frames.

loss. It can be seen that Time3D with Temporal-Consistency loss reduces the temporal-Consistency error and does not affect the position error of independent objects in a single frame. The detection accuracy and temporal-consistency error in Tab. 1 also demonstrate this effect.

Table 1. **Ablation for Temporal-Consistency Loss.** TC denotes Temporal-Consistency Error.

| Setting | TC<br>↓ (m) | mAP<br>(%) ↑ | mATE<br>(m) ↓ | mASE<br>(1-iou) ↓ | mAOE<br>(rad) ↓ | NDS<br>(%) ↑ |
|---------|-------------|--------------|---------------|-------------------|-----------------|--------------|
| w/o     | 0.51        | 31.1         | 0.730         | 0.249             | 0.511           | 39.4         |
| w/      | 0.28        | 31.2         | 0.732         | 0.254             | 0.504           | 39.4         |



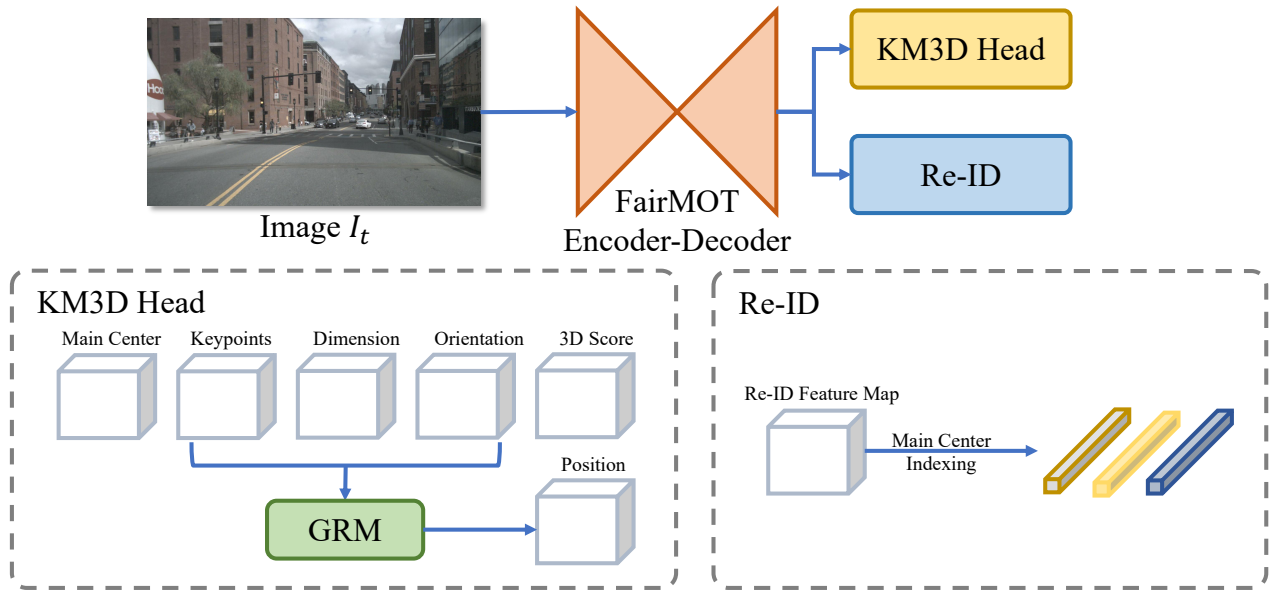

Figure 2. **Overview of Our Monocular 3D Detector.** An multi-scale FairMOT encoder-decoder network and anchor-free 3D detection head are used in our framework to provide fair features for both detection and Re-ID.

## References

- [1] Peixuan Li. Monocular 3d detection with geometric constraints embedding and semi-supervised training. 2020. [1](#)
- [2] Yifu Zhang, Chunyu Wang, Xinggang Wang, Wenjun Zeng, and Wenyu Liu. Fairmot: On the fairness of detection and re-identification in multiple object tracking. *Int. J. Comput. Vis.*, 129(11):3069–3087, 2021. [1](#)



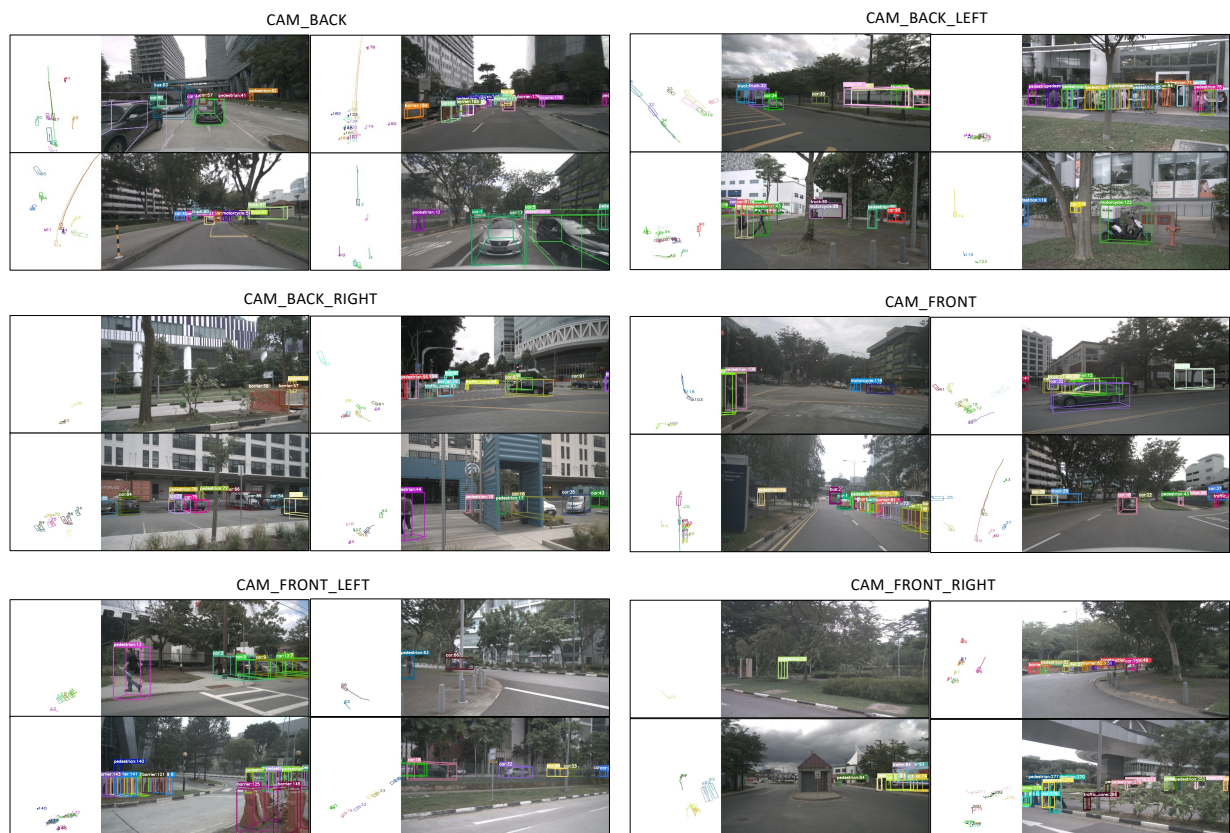

Figure 3. Qualitative Results: Sunny Day



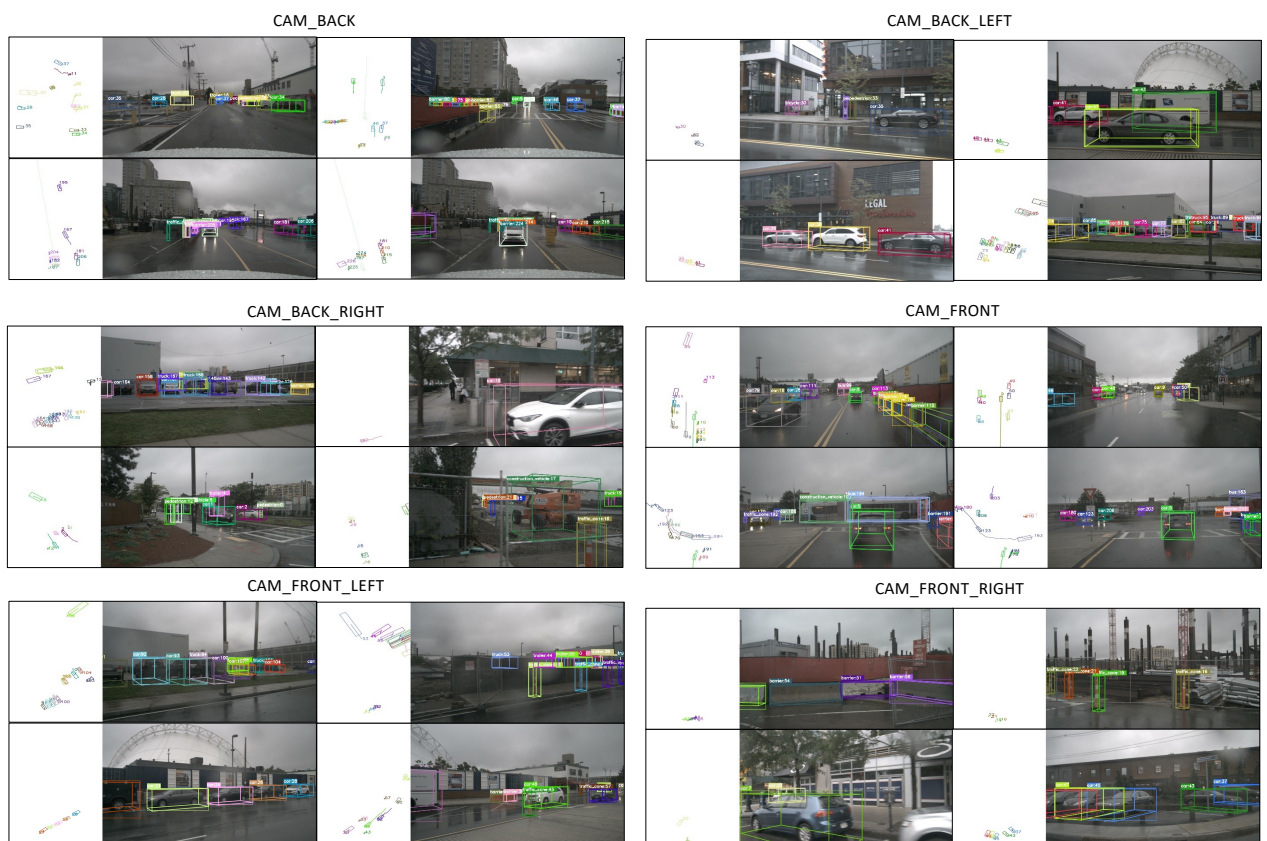

Figure 4. **Qualitative Results: Rainy Day**



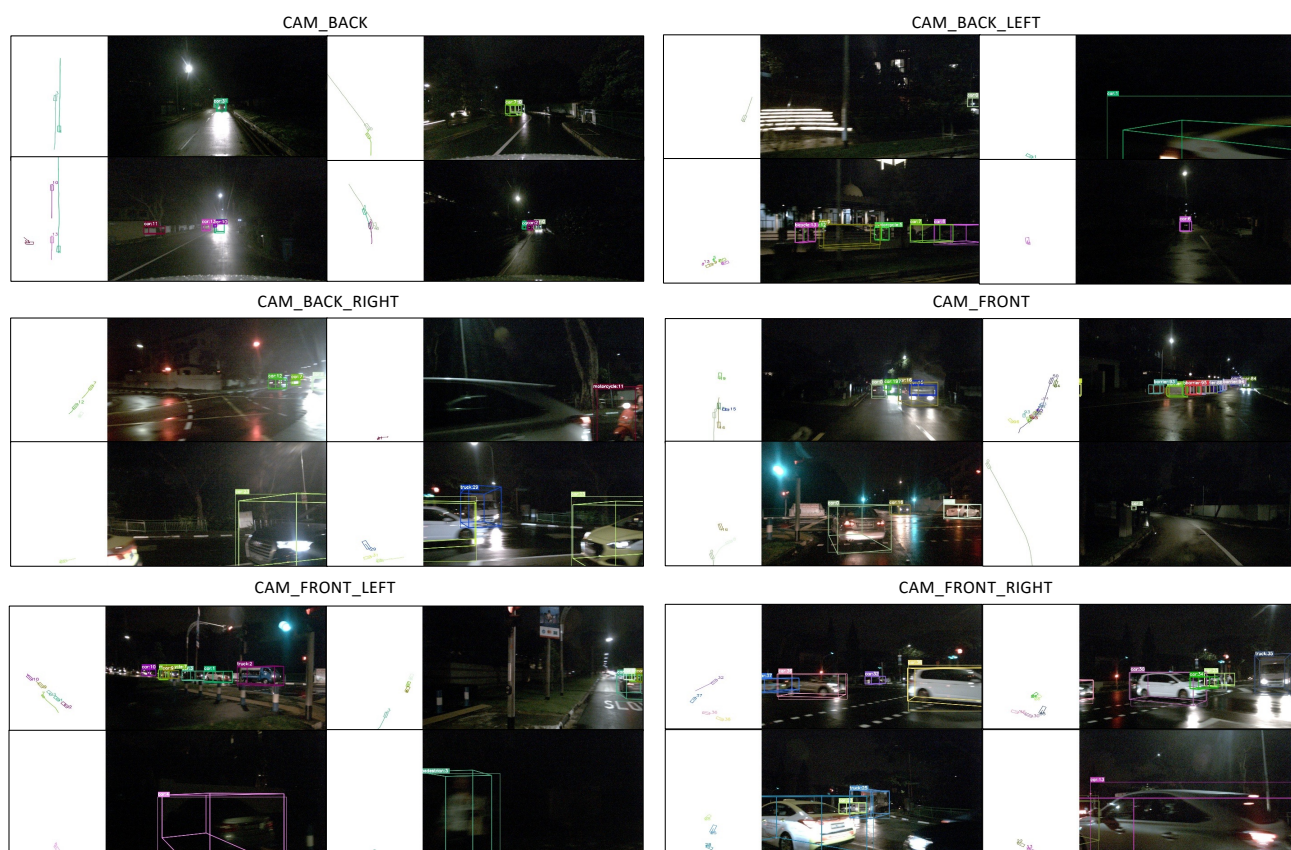

Figure 5. **Qualitative Results: Night**
